# Supplementary material for: Androgen receptor regulates SRC expression through microRNA-203
Source: PubMed Central journal article supplement (PMC5041939; doi:10.18632/oncotarget.8366), 2016-03-25
Supplement: oncotarget-07-25726-s001.pdf [file oncotarget-07-25726-s001.pdf]

# Androgen receptor regulates SRC expression through microRNA-203

## Supplementary Materials

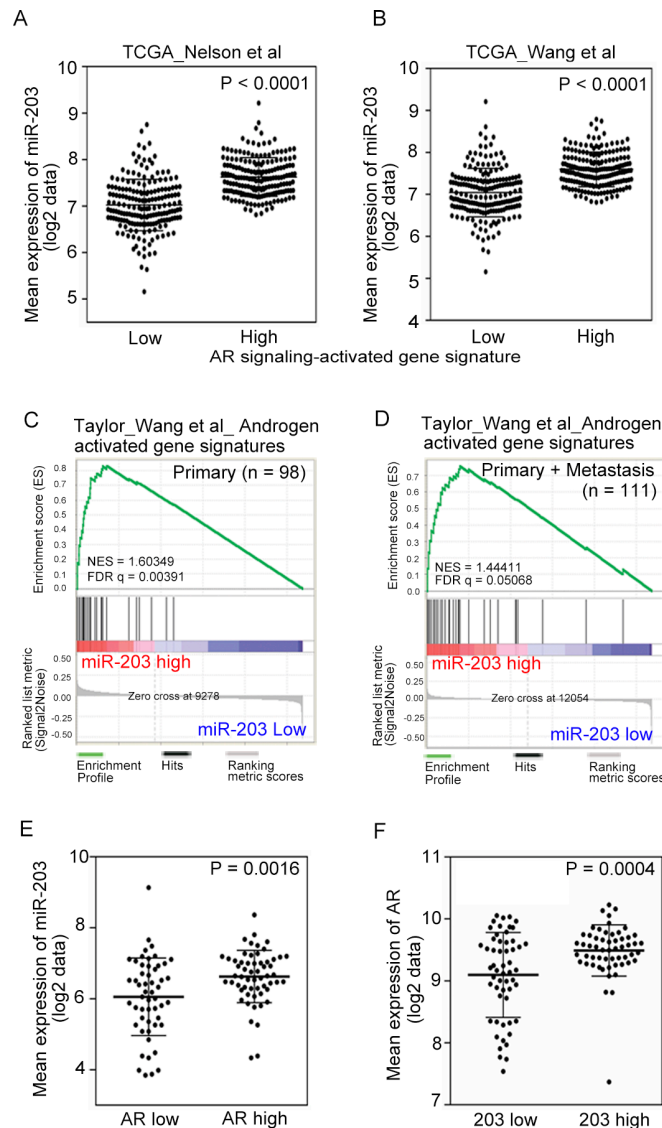

**Supplementary Figure S1: miR-203 expression is associated with androgen-activated gene signatures.** (A and B) Mean expression of miR-203 in the TCGA PCa dataset ( $n = 372$ ) relative to gene sets from Nelson et al. (A) and Wang et al. (B), the expression of which increased or decreased with AR signaling in PCa tissues. Statistical significance was determined by Student's *t*-test. (C and D) Gene set enrichment analysis (GSEA) of the Taylor PCa dataset of primary ( $n = 98$ ) (C) and combined primary and metastatic ( $n = 111$ ) (D) tumors showing enrichment of miR-203 expression in the gene set of Wang et al., the expression of which was associated with patients with increased AR signaling. NES, normalized enrichment score; FDR, false discovery rate. (E and F) Mean expression of miR-203 (E) and AR (F) in the Taylor PCa dataset ( $n = 111$ ), showing that patients with high AR and miR-203 expression had higher expression of miR-203 and AR, respectively. Statistical significance was determined by Student's *t*-test.

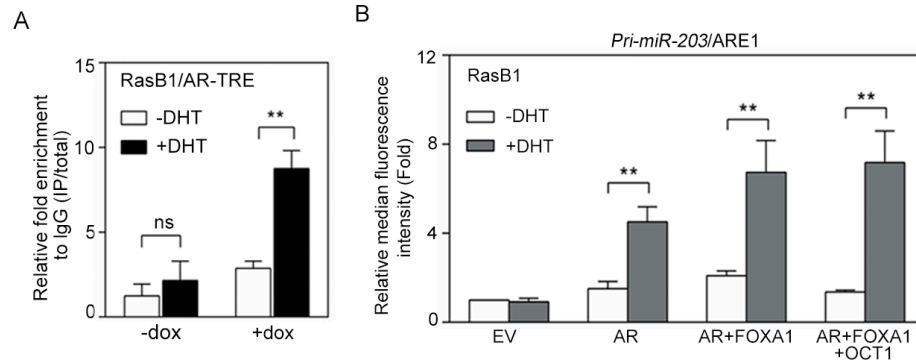

**Supplementary Figure S2: AR directly and positively binds to the *pri-miR-203* promoter.** (A) Chromatin immunoprecipitation (ChIP) analyses of putative ARE1 in the *pri-miR-203* promoter region in RasB1/AR-TRE cells following treatment for 24 h with DHT or doxycycline (dox). The data are presented as the mean  $\pm$  SEM,  $n = 3$ . \*\* $p < 0.01$ . (B) Median fluorescence intensity (MFI) of the *pri-miR-203* promoter-RFP reporter, putative ARE1 assayed in RasB1 cells with a plasmid expressing empty vector (EV), AR, FOXA1, or OCT1 following treatment for 24 h with DHT. The data are presented as the mean  $\pm$  SEM,  $n = 3$ . \*\* $p < 0.01$ .

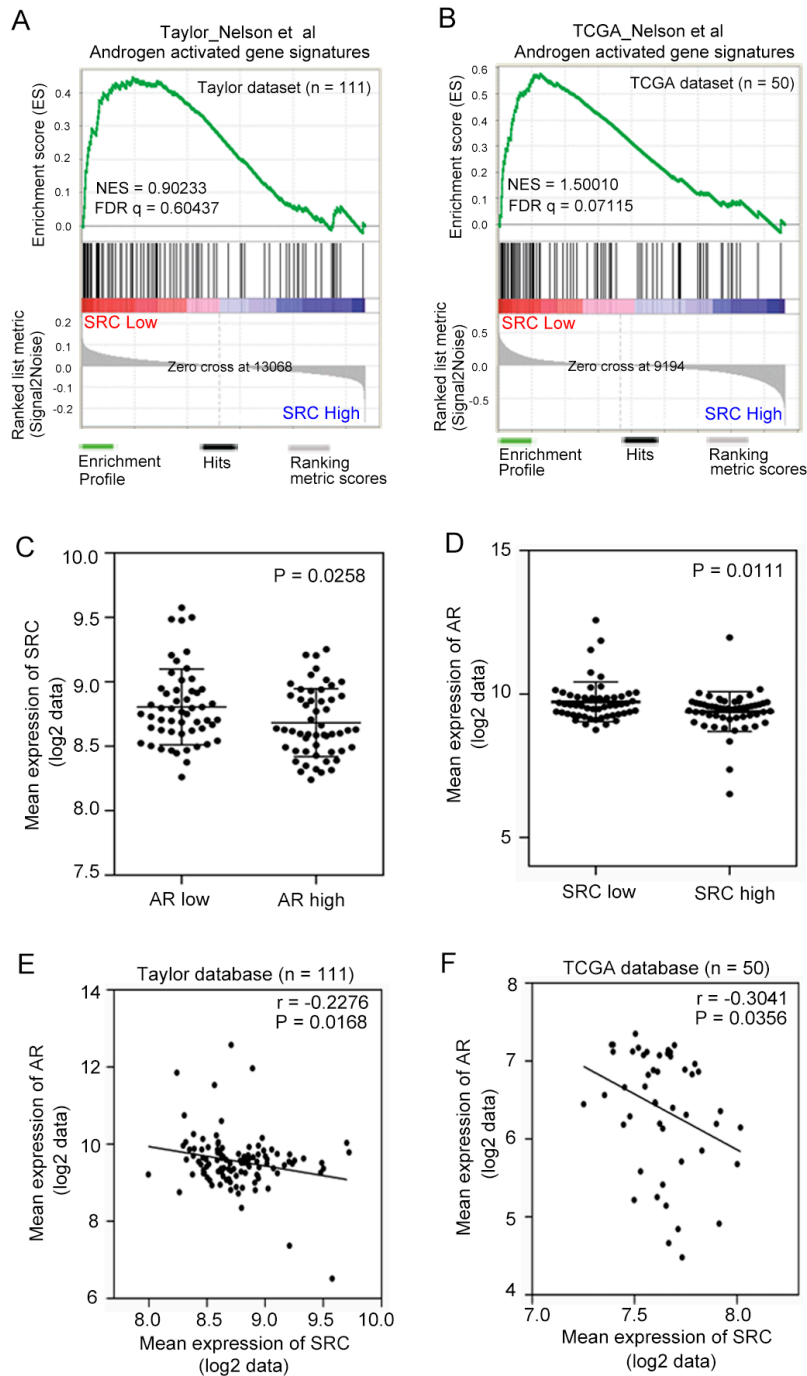

**Supplementary Figure S3: SRC was inversely correlated with androgen receptor (AR) signaling profile and AR level.**

(A and B) Gene set enrichment analysis (GSEA) of the Taylor PCa dataset ( $n = 111$ ) (A) and the TCGA dataset ( $n = 50$ ) (B) showing enrichment of AR signaling-responsive gene signatures among the gene set of Nelson et al., the expression of which was associated with patients with decreased SRC expression. NES, normalized enrichment score; FDR, false discovery rate. (C and D) Patients with low AR expression had high SRC expression (C), and patients with low SRC expression had high AR expression (D), in the Taylor PCa dataset ( $n = 111$ ). Statistical significance was determined by Student's *t*-test. (E and F) Pearson coefficient correlation analysis of the mean AR to mean SRC expression in the Taylor dataset ( $n = 111$ ) (E) and the TCGA dataset ( $n = 50$ ) (F). Significance was determined by the Gaussian population (Pearson) test.

A

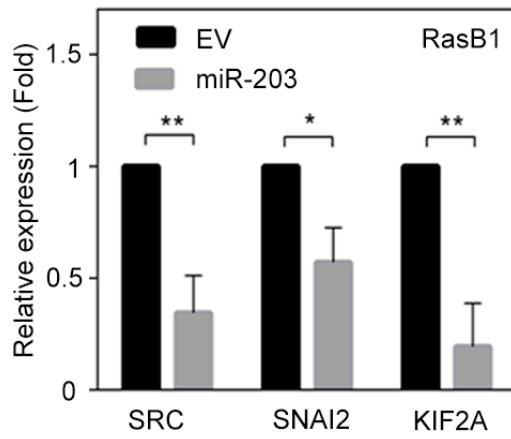

B

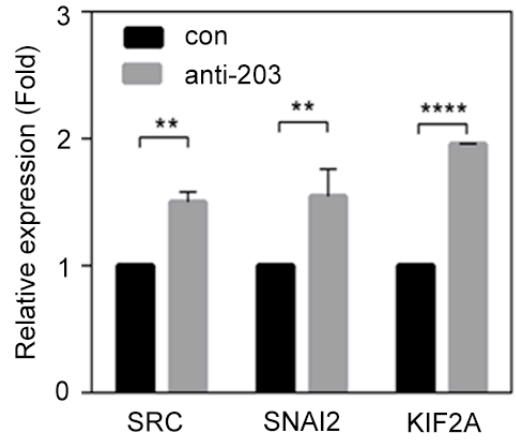

**Supplementary Figure S4: miR-203 reduces SRC, SNAI2, and KIF2A expression.** (A) Relative SRC, SNAI2, and KIF2A mRNA levels in RasB1 cells transfected with empty vector (EV) or miR-203 precursor. The data are presented as the mean  $\pm$  SEM,  $n = 3$ . \* $p < 0.05$ , \*\* $p < 0.01$ . (B) Relative SRC, SNAI2, and KIF2A mRNA levels in RasB1 cells transfected with anti-miR control (con) or anti-miR-203 inhibitor. The data are presented as the mean  $\pm$  SEM,  $n = 3$ . \*\* $p < 0.01$ , \*\*\*\* $p < 0.0001$ .

A

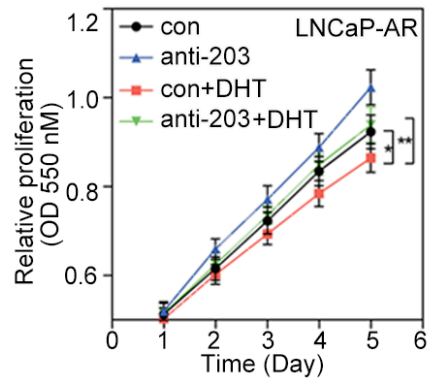

B

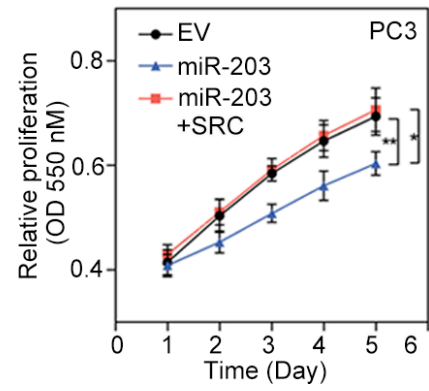

**Supplementary Figure S5: miR-203 inhibits the proliferation of AR-positive cells and rescuing SRC expression reconstituted cell growth.** (A) Proliferation of LNCaP-AR cells transfected with anti-miR control (con) or anti-miR-203 inhibitor in the presence of DHT. The data are presented as the mean  $\pm$  SEM,  $n = 6$ . \* $p < 0.05$ , \*\* $p < 0.01$ . (B) Proliferation of PC3 cells transfected with empty vector (EV), miR-203, or miR-203 reconstituted with SRC. The data are presented as the mean  $\pm$  SEM,  $n = 5$ . \* $p < 0.05$ , \*\* $p < 0.01$ .

## Supplementary Tables

### Supplementary Table S1: Primer sequences of the 3' untranslated region (UTR) and promoter reporter constructs

| Primary hsa-miR-203 promoter reporter constructs |                                        |
|--------------------------------------------------|----------------------------------------|
| Pri-mir-203 P1                                   | CAAACCCTCGTGGGATGTAG                   |
| Pri-mir-203 P2                                   | CGTACCGGACGCCTTAGAC                    |
| Pri-mir-203 P3                                   | gaggcagcagagaccgCAAACCCTCGTGGGATGTAG   |
| Pri-mir-203 P4                                   | cgaacagagagaccgCGTACCGGACGCCTTAGAC     |
| Pri-mir-203 ARE1M F                              | GAGCTCCCAAGCTCCGGATCCTGATCTCAAG        |
| Pri-mir-203 ARE1M R                              | GGAGCTTGGGAGCTCCTCCCCAACACAA           |
| 3'UTR reporter construct primer sequences        |                                        |
| SRC/psi-2 3'UTR F                                | CTCGAGCTTCTCGGCTTGGATCCTG              |
| SRC/psi-2 3'UTR R                                | GTTTAAACATGTCGTGGCCAGAGTTGAC           |
| SRC/psi-2 3'UTRM1 F                              | CCCGTACTTTGTCCCCGTGGAAGGGAAATTCCTGGCCC |
| SRC/psi-2 3'UTRM1 R                              | CCACGGGACAAAGTACGGGGAAGGAGGCCAG        |
| SRC/psi-2 3'UTRM2 F                              | GTCCCCCAAACATGTTGTACATTTACCATGGCCCC    |
| SRC/psi-2 3'UTRM2 R                              | AATGTACAACATGTTTGGGGGACGGAGCGGG        |
| SNAI2/psi-2 3'UTR F                              | CTCGAGGTGACGCATCAATGTTTACTCG           |
| SNAI2/psi-2 3'UTR R                              | GTTTAAACTTTTCTTGTTAAACAAAGAATTC        |
| KIF2A/psi-2 3'UTR F                              | CTCGAGACCGGCATTTGCTGCTAAAG             |
| KIF2A/psi-2 3'UTR R                              | GTTTAAACCAGAATTCATTCGTTTTTATTAT        |

### Supplementary Table S2: Antibody information and primer sequences for the ChIP assay

| ChIP antibodies  |                        |            |                      |          |
|------------------|------------------------|------------|----------------------|----------|
| Primary antibody | Species                | Clonality  | Source               | Dilution |
| AR               | Rabbit                 | Monoclonal | Epitomics (#3184-1)  | 1/50     |
| FOXA1            | Rabbit                 | Polyclonal | Abcam (ab23738)      | 1/50     |
| OCT1             | Rabbit                 | Polyclonal | Novus (NB100-91899)  | 1/50     |
| GAPDH            | Mouse                  | Monoclonal | Novus (NB300-221)    | 1/50     |
| IgG              | Rabbit                 |            | Santa Cruz (sc-2027) | 1/50     |
| IgG              | Mouse                  |            | Santa Cruz (sc-2343) | 1/50     |
| ChIP primers     |                        |            |                      |          |
| Site             | 5'–3'                  |            |                      |          |
| 203ARE1 F        | GAAGAGAGGTGGGTTCTTCTTG |            |                      |          |
| 203ARE1 R        | GGGATGGAAGTGGGCATAG    |            |                      |          |
| 203ARE2 F        | CCTTTCTGATTCCTTTCCA    |            |                      |          |
| 203ARE2 R        | AGTGCTCAGGAGCCAAGGT    |            |                      |          |
| 203ARE3 F        | CACTAATGGCTCCAGACTTGG  |            |                      |          |
| 203ARE3 R        | GCCGGTCTACCCACTTAG     |            |                      |          |

**Supplementary Table S3: Primer sequences for the qRT-PCR**

| Gene    | 5'-3'                |
|---------|----------------------|
| SRC F   | CCAGGCTGAGGAGTGGTATT |
| SRC R   | TTCGTGGTCTCAGTTTCTCG |
| SNAI2 F | TGGTTGCTTCAAGGACACAT |
| SNAI2 R | GCAGATGAGCCCTCAGATTT |
| KIF2A F | CATTGATTTGGCTGGAAATG |
| KIF2A R | AAGGCTCTGATGCACTCCTT |
| GAPDH F | CCAGTAGAGGCAGGGATGAT |
| GAPDH R | CTTCATTGTCTTTTCCGCC  |

**Supplementary Table S4: Antibody information for Western blotting**

| Primary antibody | Clonality  | Source                 | Dilution | Secondary antibody | Source       | Dilution |
|------------------|------------|------------------------|----------|--------------------|--------------|----------|
| SRC              | Polyclonal | Cell Signaling (#2109) | 1/2000   | anti-rabbit IgG    | Jackson Labs | 1/5000   |
| SNAI2            | Polyclonal | Cell Signaling (#9585) | 1/500    | anti-rabbit IgG    | Jackson Labs | 1/5000   |
| KIF2A            | Polyclonal | Abcam (ab37005)        | 1/1000   | anti-rabbit IgG    | Jackson Labs | 1/5000   |
| GAPDH            | Monoclonal | Novus (NB300-221)      | 1/1000   | anti-mouse IgG     | Jackson Labs | 1/5000   |
| $\beta$ -actin   | Polyclonal | GeneTex (GTX109639)    | 1/1000   | anti-rabbit IgG    | Jackson Labs | 1/20,000 |
